# Supplementary material for: Alcohol Consumption, Cigarette Smoking, and Risk of Breast Cancer for BRCA1 and BRCA2 Mutation Carriers: Results from The BRCA1 and BRCA2 Cohort Consortium
Source: Oxford University Press journal article supplement (doi:10.1158/1055-9965.epi-19-0546), 2019-12-02
Supplement: 10559965epi190546-sup-222227_3_supp_5869362_q07js4.docx [file 10559965epi190546-sup-222227_3_supp_5869362_q07js4.docx]

**Table 1S. List of studies and their acronyms**

| Study | Country | Names |
| --- | --- | --- |
|
| KConFab | Australia, New Zealand | Kathleen Cuningham Foundation Consortium for Research into Familial Breast Cancer |
| MUV-Austria | Austria | Medical University of Vienna |
| Belgium | Belgium |  |
| INHERIT | Canada | Interdisciplinary Health Research Internal Team Breast Cancer Susceptibility Study |
| OUH | Denmark | Odense University Hospital |
| GENEPSO | France | Gene Etude Prospective Sein Ovaire |
| GC-HBOC | Germany | German Consortium of Hereditary Breast and Ovarian Cancer |
| DKFZ | Germany | Deutsches Krebsforschungszentrum |
| Dusseldorf Germany | Germany | Dusseldorf Germany |
| NIO-Hungry | Hungry | National Institute of Oncology |
| Milan Italy | Italy | Milan Italy |
| HEBON | Netherlands | Hereditary Breast and Ovarian cancer study Netherlands |
| CNIO | Spain | Centro Nacional de Investigaciones Oncológicas |
| HCSC | Spain | Hospital Clinico San Carlos |
| HSP | Spain | Hospital de la Santa Creu i Sant Pau |
| Lund-BRCA | Sweden | Lund BRCA |
| Stockholm-BRCA | Sweden | Stockholm BRCA |
| EMBRACE | United Kingdom, Ireland | Epidemiological Study of Familial Breast Cancer |
| BCFR | United States, Canada, Australia | Breast Cancer Family Registry |
| IHCC | Poland | International Hereditary Cancer Center |
| MODSQUAD | Czech Republic | Modifier Study of Quantitative Effects on Disease |
