# Supplementary material for: Alcohol Consumption, Cigarette Smoking, and Risk of Breast Cancer for BRCA1 and BRCA2 Mutation Carriers: Results from The BRCA1 and BRCA2 Cohort Consortium
Source: Oxford University Press journal article supplement (doi:10.1158/1055-9965.epi-19-0546), 2019-12-02
Supplement: 10559965epi190546-sup-222227_3_supp_5869363_q07jsc.docx [file 10559965epi190546-sup-222227_3_supp_5869363_q07jsc.docx]

**Table 2S: Associations of alcohol and tobacco consumption on BC risk for *BRCA1* and *BRCA2* mutation carriers, from a pseudo-incident cohort analyses (weighted)**

|  | **BRCA1** | | | **BRCA2** | | | |
| --- | --- | --- | --- | --- | --- | --- | --- |
|  | **HRa** | **95% CI** | **p-value** | **HRa** | **95% CI** | | **p-value** |
| **Smoking/alcohol status** |  |  |  |  |  | |  |
| Never | 1.00 |  |  | 1.00 |  | |  |
| Ever, alcohol only | 1.16 | (0.96, 1.41) | 0.13 | 1.20 | (0.90, 1.61) | | 0.21 |
| Ever, smoking only | 1.12 | (0.88, 1.42) | 0.37 | 1.32 | (0.93, 1.88) | | 0.12 |
| Ever, smoking and  alcohol | 1.10 | (0.91, 1.33) | 0.32 | 1.26 | (0.95, 1.65) | | 0.11 |
| **Cigarettes per day*** |  |  |  |  |  | |  |
| 0 | 1.00 |  |  | 1.00 |  | |  |
| < 5 | 1.09 | (0.88, 1.33) | 0.44 | 1.09 | (0.83, 1.44) | | 0.54 |
| 6-10 | 0.95 | (0.77, 1.16) | 0.59 | 1.11 | (0.84, 1.45) | | 0.47 |
| 11-20 | 0.97 | (0.81, 1.17) | 0.78 | 1.22 | (0.95, 1.57) | | 0.11 |
| > 20 | 1.08 | (0.74, 1.57) | 0.69 | 0.89 | (0.56, 1.40) | | 0.61 |
| Continuous (missing excluded)* | 1.00 | (0.99, 1.01) | 0.92 | 1.00 | (0.99, 1.01) | | 0.38 |
| **Smoking and Parity*** |  |  |  |  |  | |  |
| Never smoke & parous | 1.00 |  |  | 1.00 |  | |  |
| Never smoke & nulliparous | 0.89 | (0.72, 1.11) | 0.30 | 0.96 | (0.70, 1.30) | | 0.78 |
| Ever smoke & nulliparous | 0.97 | (0.76, 1.23) | 0.78 | 0.99 | (0.71, 1.39) | | 0.97 |
| Ever smoke & parous |  |  |  |  |  | |  |
| 5 yrs or less before 1st FTP | 0.87 | (0.70, 1.08) | 0.21 | 1.13 | (0.87, 1.47) | | 0.36 |
| > 5 yrs before 1st FTP | 1.09 | (0.90, 1.32) | 0.38 | 1.23 | (0.96, 1.57) | | 0.10 |
| **Glasses of alcohol at age 20 years per day§** |  |  |  |  |  |  | |
| 0 | 1.00 |  |  | 1.00 |  |  | |
| <1 | 1.11 | (0.93, 1.33) | 0.26 | 1.15 | (0.90, 1.47) | 0.27 | |
| 1-2 | 0.88 | (0.70, 1.11) | 0.29 | 0.93 | (0.70, 1.24) | 0.63 | |
| >2 | 0.73 | (0.50, 1.06) | 0.10 | 0.79 | (0.51, 1.24) | 0.31 | |
| Continuous (per glass)§ | 0.89 | (0.81, 0.99) | 0.03 | 0.96 | (0.84, 1.09) | 0.53 | |

***** Adjusted for alcohol consumption (ever vs. never)

§ Adjusted for tobacco consumption (ever vs. never)

a Stratified on birth cohort and 5 country study groups for the retrospective analyses
