# Supplementary material for: Alcohol Consumption, Cigarette Smoking, and Risk of Breast Cancer for BRCA1 and BRCA2 Mutation Carriers: Results from The BRCA1 and BRCA2 Cohort Consortium
Source: Oxford University Press journal article supplement (doi:10.1158/1055-9965.epi-19-0546), 2019-12-02
Supplement: 10559965epi190546-sup-222227_3_supp_5869366_q07jsx.docx [file 10559965epi190546-sup-222227_3_supp_5869366_q07jsx.docx]

**Table 5S. Association of alcohol and tobacco consumption with breast cancer risk for pooled *BRCA1* and *BRCA2* mutation carriers cohorts, retrospective (weighted) and prospective analyses**

|  | **retrospective** | | **P value** | **prospective** | **P value** |
| --- | --- | --- | --- | --- | --- |
|  | **HRa (95% CI)** | |  | **HRa (95% CI)** |  |
| **Smoking/alcohol status** |  | |  |  |  |
| Never | 1.00 | |  | 1.00 |  |
| Ever, alcohol only | 1.12 (0.97,1.28) | | 0.12 | 0.86 (0.65,1.14) | 0.29 |
| Ever, smoke only | 1.22 (1.02,1.45) | | 0.03 | 0.85 (0.59,1.23) | 0.39 |
| Ever, smoke and  alcohol | 1.14 (1.00,1.31) | | 0.05 | 1.06 (0.81,1.40) | 0.65 |
| **Cigarettes per day* (current or past)** |  | |  |  |  |
| 0 | 1.00 | |  | 1.00 |  |
| < 5 | 1.03 (0.89,1.19) | | 0.67 | 1.15 (0.83,1.58) | 0.40 |
| 6-10 | 1.09 (0.95,1.26) | | 0.20 | 1.23 (0.92,1.65) | 0.16 |
| 11-20 | 1.15 (1.01,1.30) | | 0.03 | 1.05 (0.80,1.38) | 0.70 |
| > 20 | 1.05 (0.83,1.34) | | 0.67 | 1.03 (0.64,1.64) | 0.91 |
| Continuous (missing excluded)* | 1 1.00 (1.00, 1.01) | | 0.06 | 11 1.00 (0.99, 1.01) | 0.54 |
| **Number of Pack-Years*** |  |  | |  |  |
| <1 |  | | | 1.00 |  |
| 1-20 | 1.16 (0.93,1.44) | 0.19 |
| >20 | 1.06 (0.76,1.48) | 0.73 |
| Continuous (missing excluded)* | 1.00 (0.99, 1.01) | 0.44 |
| **Age at start smoking (years)*** |  |  | |  |  |
| Never | 1.00 |  | | 1.00 |  |
| < 15 | 1.11 (0.95,1.30) | 0.20 | | 1.21 (0.89,1.65) | 0.23 |
| 16-19 | 1.17 (1.04,1.33) | 0.01 | | 1.09 (0.84,1.40) | 0.53 |
| >20 | 1.00 (0.85,1.17) | 0.96 | | 1.32 (0.93,1.89) | 0.13 |
| **Age at start for parous women (years)*** |  |  | |  |  |
| Never | 1.00 |  | | 1.00 |  |
| < 15 | 1.14 (0.96,1.35) | 0.14 | | 1.28 (0.93,1.78) | 0.13 |
| 16-19 | 1.19 (1.04,1.35) | 0.01 | | 1.07 (0.82,1.41) | 0.61 |
| >20 | 0.99 (0.83,1.17) | 0.88 | | 1.29 (0.87,1.91) | 0.20 |
| **Age at start for nulliparous women (years)*** |  |  | |  |  |
| Never | 1.00 |  | | 1.00 |  |
| < 15 | 1.08 (0.71,1.66) | 0.71 | | 0.92 (0.36,2.37) | 0.87 |
| 16-19 | 1.12 (0.82,1.53) | 0.48 | | 1.01 (0.48,2.09) | 0.99 |
| >20 | 1.05 (0.70,1.59) | 0.81 | | 1.26 (0.48,3.35) | 0.64 |
| **Smoking and Parity*** |  |  | |  |  |
| Never smoke & parous | 1.00 |  | | 1.00 |  |
| Never smoke & nulliparous | 1.23 (1.05,1.44) | 0.01 | | 0.74 (0.52,1.05) | 0.09 |
| Ever smoke & nulliparous | 1.31 (1.10,1.56) | 0.002 | | 0.76 (0.50,1.14) | 0.18 |
| Ever smoke & parous |  |  | |  |  |
| 5 yrs or less before F FTP | 1.02 (0.90,1.17) | 0.72 | | 1.06 (0.78,1.44) | 0.72 |
| > 5 yrs before FFTP | 1.22 (1.07,1.38) | 0.002 | | 1.32 (1.02,1.71) | 0.03 |
| **Glasses of alcohol last year per day§** |  |  | |  |  |
| 0 |  | | | 1.00 |  |
| <1 | 0.95 (0.74,1.22) | 0.69 |
| 1-2 | 1.00 (0.76,1.31) | 0.99 |
| >2 | 0.96 (0.59,1.57) | 0.86 |
| Continuous (per glass)§ | 0.98 (0.85,1.13) | 0.77 |
| **Glasses of alcohol per day§ at age 20** |  |  | |  |  |
| 0 | 1.00 |  | | 1.00 |  |
| <1 | 1.06 (0.94,1.19) | 0.32 | | 1.01 (0.74,1.39) | 0.94 |
| 1-2 | 0.90 (0.78,1.04) | 0.16 | | 0.95 (0.64,1.40) | 0.79 |
| >2 | 0.70 (0.55,0.89) | 0.004 | | 1.02 (0.55,1.89) | 0.95 |
| Continuous (per glass)§ | 0.93 (0.87,0.99) | 0.03 | | 0.99 (0.83,1.19) | 0.94 |

***** Adjusted for alcohol consumption (ever vs. never)

§ Adjusted for tobacco consumption (ever vs. never).

a Stratified on birth cohort and 6 study groups for the retrospective and prospective analyses
