# Supplementary material for: Alcohol Consumption, Cigarette Smoking, and Risk of Breast Cancer for BRCA1 and BRCA2 Mutation Carriers: Results from The BRCA1 and BRCA2 Cohort Consortium
Source: Oxford University Press journal article supplement (doi:10.1158/1055-9965.epi-19-0546), 2019-12-02
Supplement: 10559965epi190546-sup-222227_3_supp_5869432_q07jst.docx [file 10559965epi190546-sup-222227_3_supp_5869432_q07jst.docx]

Supplemental Figure 1b: Association of smoking for more than 5 years before the FFTP with breast cancer risk for *BRCA2* mutation carriers by study group (prospective analysis)
